# Supplementary material for: Bioinspired hybrid eumelanin–TiO2antimicrobial nanostructures: the key role of organo–inorganic frameworks in tuning eumelanin's biocide action mechanism through membrane interaction
Source: Royal Society of Chemistry journal article supplement (doi:10.1039/c8ra04315a), 2018-01-01
Supplement: c8ra04315a1.pdf [file c8ra04315a1.pdf]

## Supplementary Information

Giuseppe Vitiello<sup>a,b</sup>, Anna Zanfardino<sup>c</sup>, Olimpia Tammaro<sup>b,d</sup>, Michela Di Napoli<sup>c</sup>,  
Maria Federica Caso<sup>e</sup>, Alessandro Pezzella<sup>f,g,h</sup>, Mario Varcamonti<sup>c</sup>, Brigida Silvestri<sup>a</sup>,  
Gerardino D'Errico<sup>b,h</sup>, Aniello Costantini<sup>a</sup>, Giuseppina Luciani<sup>a,\*</sup>

<sup>a</sup> Department of Chemical, Materials and Production Engineering, University of Naples "Federico II", p.le V. Tecchio 80, 80125 Naples, Italy.

<sup>b</sup> CSGI, Consorzio Interuniversitario per lo Sviluppo dei Sistemi a Grande Interfase, Via della Lastruccia 3, 50019 Florence, Italy.

<sup>c</sup> Department of Biology, University of Naples "Federico II" via Cintia 4, 80126 Naples, Italy.

<sup>d</sup> Center for Advanced Biomaterials for Health Care, Istituto Italiano di Tecnologia, Largo Barsanti e Matteucci, Naples, Italy.

<sup>e</sup> Nanofaber Spin-off at Italian National Agency for New Technologies, Energy and Sustainable Economic Development (ENEA), Casaccia Research Centre, Via Anguillarese 301, 00123 Rome, Italy

<sup>f</sup> Institute for Polymers, Composites and Biomaterials (IPCB), CNR, Via Campi Flegrei 34, 80078 Pozzuoli (Na), Italy.

<sup>g</sup> National Interuniversity Consortium of Materials Science and Technology (INSTM), Piazza S. Marco, 4 – 50121 Florence, Italy

<sup>h</sup> Department of Chemical Sciences, University of Naples "Federico II" via Cintia 4, 80126 Naples, Italy.

\*corresponding author. E-mail: [luciani@unina.it](mailto:luciani@unina.it); Tel.: +39 081 76 82433; Fax: +39 081 76 82595.

\*corresponding author. E-mail: [luciani@unina.it](mailto:luciani@unina.it) Tel.:+39 081 7682433; Fax: +39 081 7682595

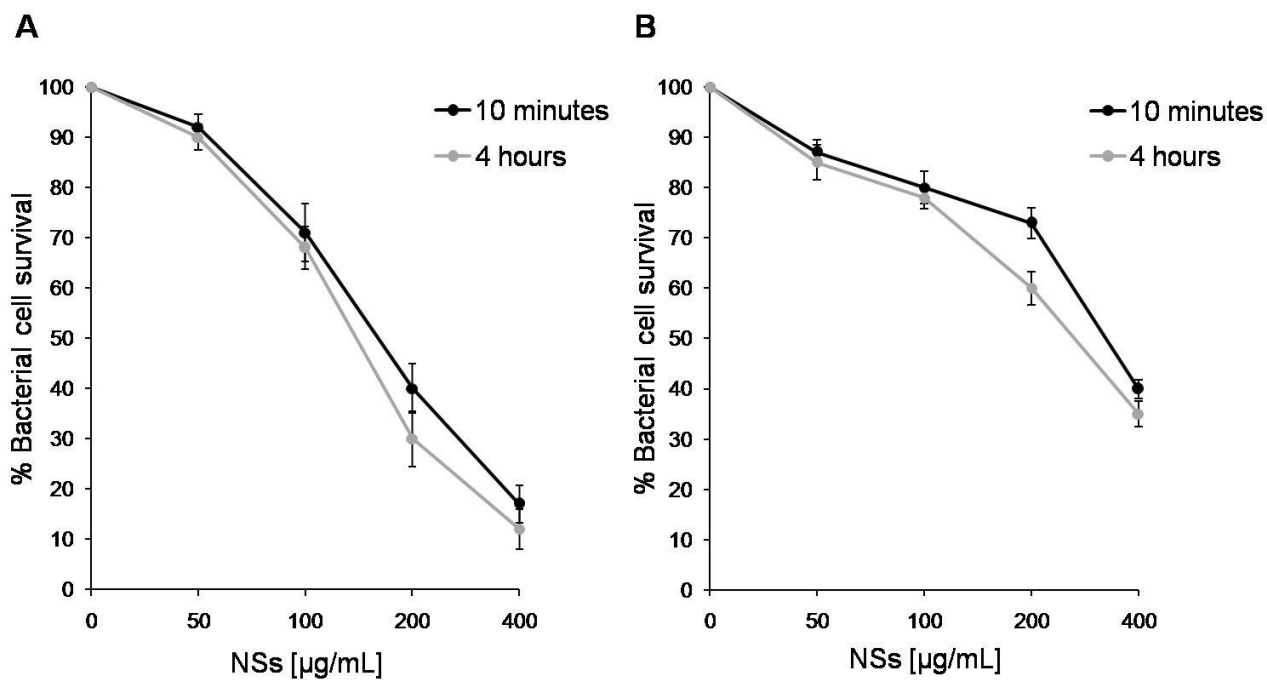

**Fig. S1** Antimicrobial activity of DHICA-eumelanin (**panel A**), and TiO<sub>2</sub>DHICA<sub>ti</sub> (**panel B**) at different concentrations (50-400  $\mu\text{g/mL}$ ) valuated by colony count assay, after 4 hours (gray circles) and 10 minutes (black circles) of incubation, against *Escherichia coli* DH5 $\alpha$  strain. The % of bacterial survival is represented on the y axis. The assays were performed in three independent experiments.

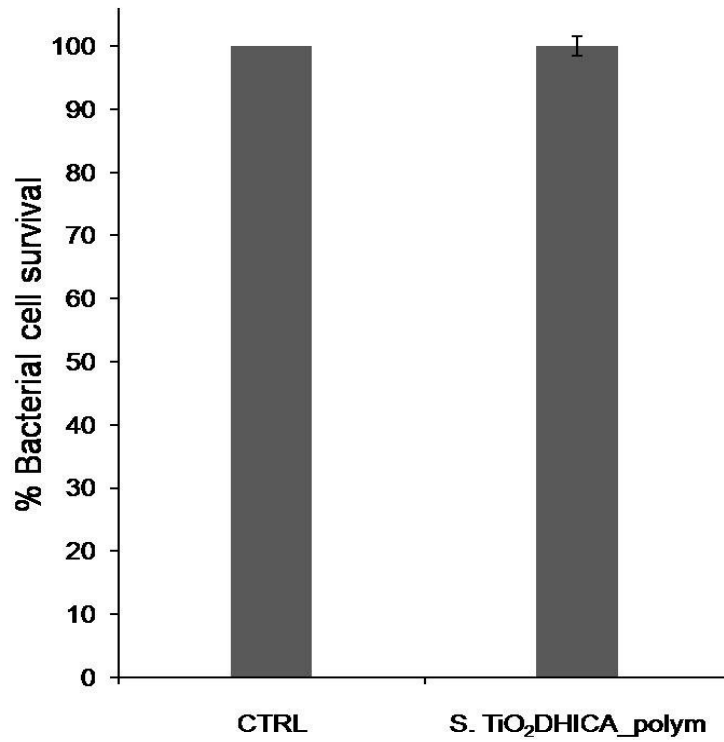

**Fig. S2** Antimicrobial activity of TiO<sub>2</sub>DHICA\_polym supernatant valuated by colony count assay, after 4 hours of incubation, against *Escherichia coli* DH5 $\alpha$  strain. The % of bacterial survival is represented on the y axis. The assays were performed in three independent experiments. P value < 0.05.

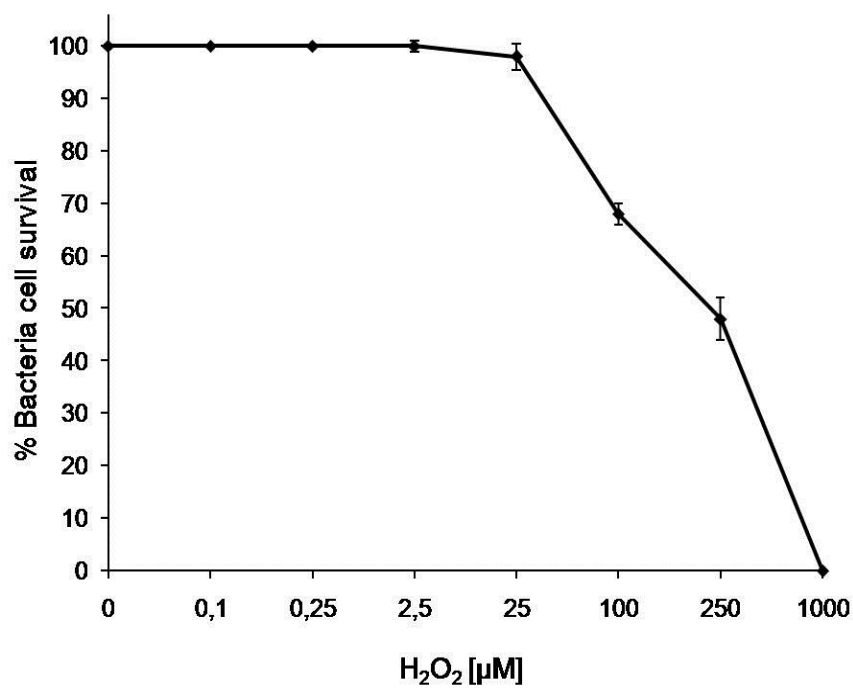

**Fig. S3** Antimicrobial activity of H<sub>2</sub>O<sub>2</sub> (hydrogen peroxide) at different concentrations (0.1-1000μM) valuated by colony count assay, against *Escherichia coli* DH5a strain. The % of bacterial survival is represented on the y axis. The assays were performed in three independent experiments.

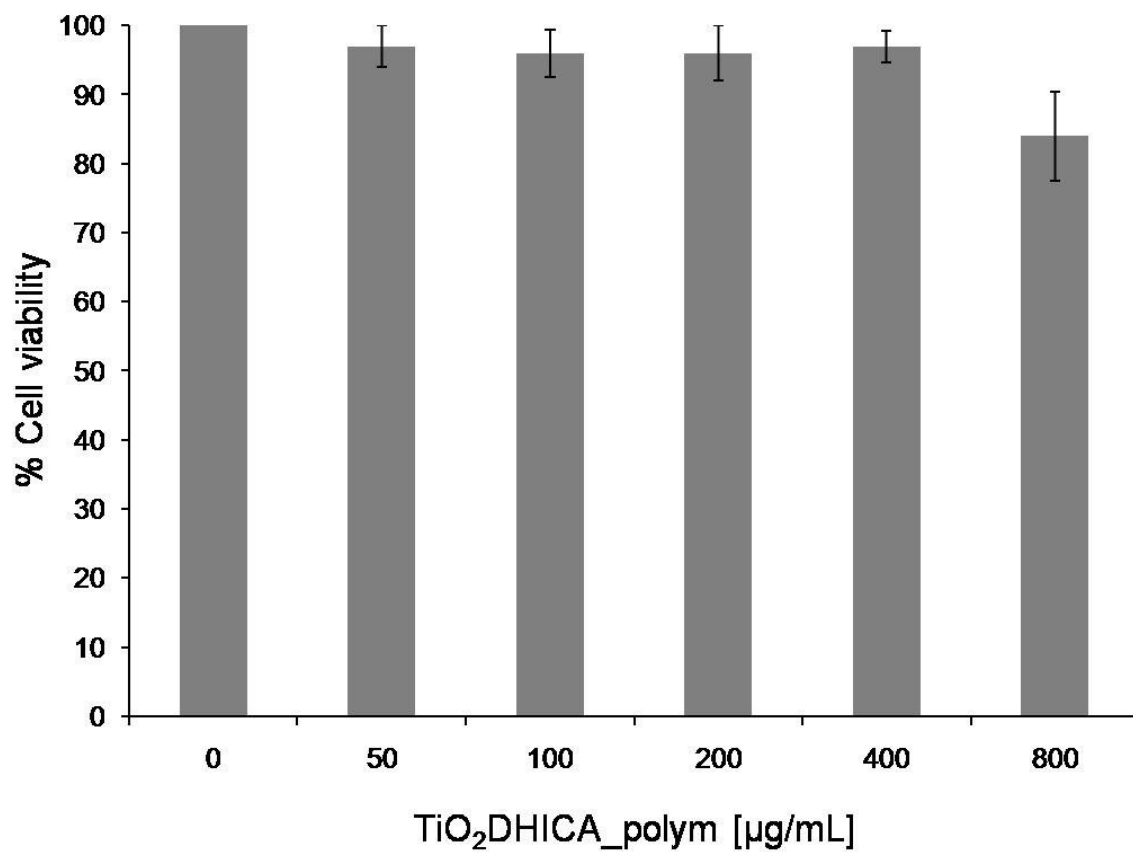

**Fig. S4** Cytotoxic effects of TiO<sub>2</sub>DHICA\_polym (0-800 μg/mL) on human eukaryotic cells (keratinocytes) by MTT assay. The assays were performed in three independent experiments. P value < 0.05.

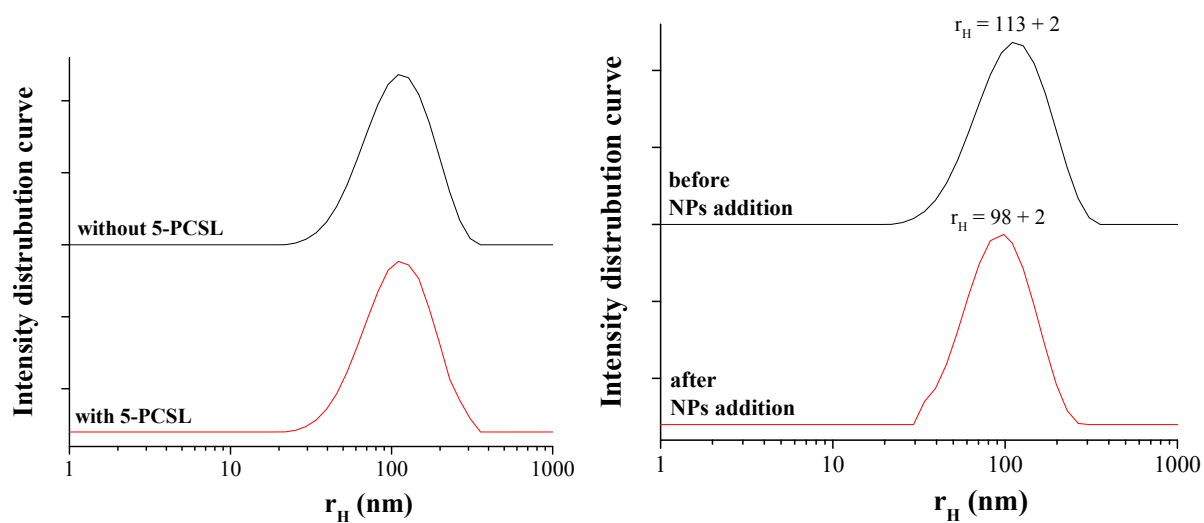

**Fig. S5** Size distribution curves by intensity of freshly prepared DOPE/DOPG/LPS liposomes incorporating and not-incorporating 5-PCSL spin-label (panel A); before and after addition of  $\text{TiO}_2\text{DHICA\_polym}$  nanostructures (panel B).
